# Supplementary material
Source: publisher site journal article supplement (https://www.degruyterbrill.com/publication/isbn/9783486842906/downloadAsset/9783486842906_Buchinformation.pdf)
Supplement: Supplementary file 1 [file 9783486842906_Buchinformation.pdf]

## Makro für Bachelor-Studenten

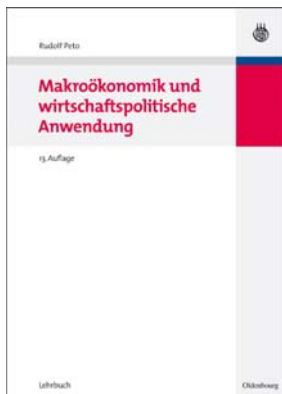

Rudolf Peto

### Makroökonomik und wirtschaftspolitische Anwendung

13. völlig überarbeitete und erweiterte Auflage 2008  
435 Seiten I Broschur I € 34,80  
ISBN 978-3-486-58235-2

Die theoretischen Grundlagen gesamtwirtschaftlicher Zusammenhänge werden in diesem Lehrbuch dargestellt. Der Kreislaufgedanke und die Wirkungen einzelner Maßnahmen auf den Wirtschaftskreislauf und damit auf die Beschäftigung stehen dabei im Vordergrund.

Dieses Buch wurde für Studenten der Wirtschaftswissenschaften als Einführung in die Makroökonomik geschrieben. Aufbau und Didaktik dieses Buches sind daher auf die Bedürfnisse dieser Zielgruppe abgestimmt: Die Sprache ist einfach gehalten; an vielen Stellen wurden Wiederholungen eingebaut, damit sich die Studenten an die Fachausdrücke gewöhnen können. Mathematische Schaubilder und Herleitungen wurden ausführlich dargestellt und möglichst noch verbal erläutert. Denn die Mathematik erlaubt zwar eine präzise und zugleich eine vereinfachte Darstellung vieler ökonomischer Zusammenhänge, ist für viele Studenten aber immer noch eine „Fremdsprache“. Zum einfacheren Verständnis wurden aus diesem Grunde meist lineare Funktionen verwendet.

---

Das Buch ist für Studierende von Bachelorstudiengängen der Wirtschaftswissenschaften an Fachhochschulen und Universitäten sowie für interessierte Praktiker geeignet.

---

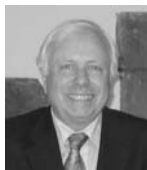

Rudolf Peto war Professor für Volkswirtschaftslehre, insbesondere Makroökonomik an der Fachhochschule Bielefeld.

[www.oldenbourg.de](http://www.oldenbourg.de)

Pressereferat Wirtschafts- und Sozialwissenschaften – Mareike Kuttig  
Oldenbourg Wissenschaftsverlag I Rosenheimer Str. 145 I 81671 München  
Tel.: +49 89 45051-467 I Fax: +49 89 45051-292 I [kuttig@oldenbourg.de](mailto:kuttig@oldenbourg.de)

Alle Veröffentlichungen des Oldenbourg Verlags sind über den Buchhandel zu beziehen.  
Rezensionsexemplare auf Anforderung.
